# Supplementary material for: Epistatic interactions between the high pathogenicity island and other iron uptake systems shape Escherichia coli extra-intestinal virulence
Source: PubMed Central journal article supplement (PMC10282060; doi:10.1038/s41467-023-39428-y), 2023-06-20
Supplement: 41467_2023_39428_MOESM3_ESM.pdf [file 41467_2023_39428_MOESM3_ESM.pdf]

## **Description of Additional Supplementary Data:**

**Supplementary data 1.** Principal characteristics of the 232 Escherichia coli CC87 strains studied

**Supplementary data 2.** KruskalWallis test p-values after Bonferroni correction of VAGs, two-sided Fisher exact test p-values after Bonferroni correction of antibiotic resistance data.

**Supplementary data 3.** Antibiotic resistance prediction according to genes/mutations.

**Supplementary data 4.** Odds ratio for the cooccurrences of VAGs *fyuA*, *iroN*, *iucA* and *sitA* in the different ST/STc and phylogroups (Two-sided Fisher exact test).

**Supplementary data 5.** Chromosomal insertion sites of *iroN*.

**Supplementary data 6.** Chromosomal insertion sites of *iucA*.

**Supplementary data 7.** Chromosomal insertion sites of *sitA*.

**Supplementary data 8.** Associations between the presence of HPI and the presence of another iron-capture system using Pagel's model. The p-values were corrected using the Bonferroni correction method. Significant results are in bold.

**Supplementary data 9.** Recapitulative table of molecular defaults (nonsense, small and large deletion and insertion) found on the four iron capture systems and on core *mlst* genes. We computed the inactivation rate as the number of strains with at least one defaults over gene length.

**Supplementary data 10.** Associations between the inactivation of genes in one ironcapture system and the presence of another iron-capture system using Pagel's model. The p-values were corrected using the Bonferroni correction method. Significant results are in bold.

**Supplementary data 11.** List of the 2302 fully sequenced genomes from RefSeq.
